# Supplementary material
Source: PubMed Central journal article supplement (PMC6437623)
Supplement: Supp_Fig1.pdf [file Supp_Fig1.pdf]

## Supplementary Data

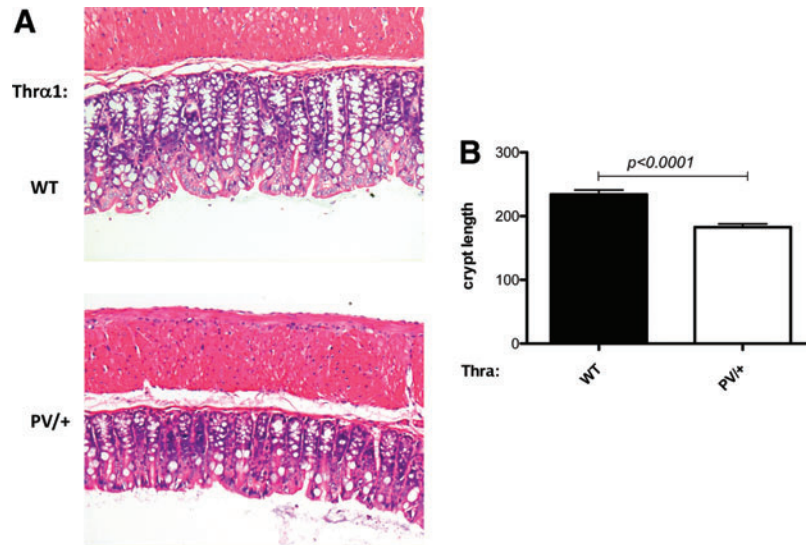

**SUPPLEMENTARY FIG. S1.** Reduction in the length of crypts in the large intestine in *Thral*<sup>PV/+</sup> mice. (A) H&E staining in the large intestine sections for WT and *Thral*<sup>PV/+</sup> mice. (B) Quantification of the crypt length in the large intestine.
