# Supplementary material
Source: PubMed Central journal article supplement (PMC6437623)
Supplement: Supp_Fig2.pdf [file Supp_Fig2.pdf]

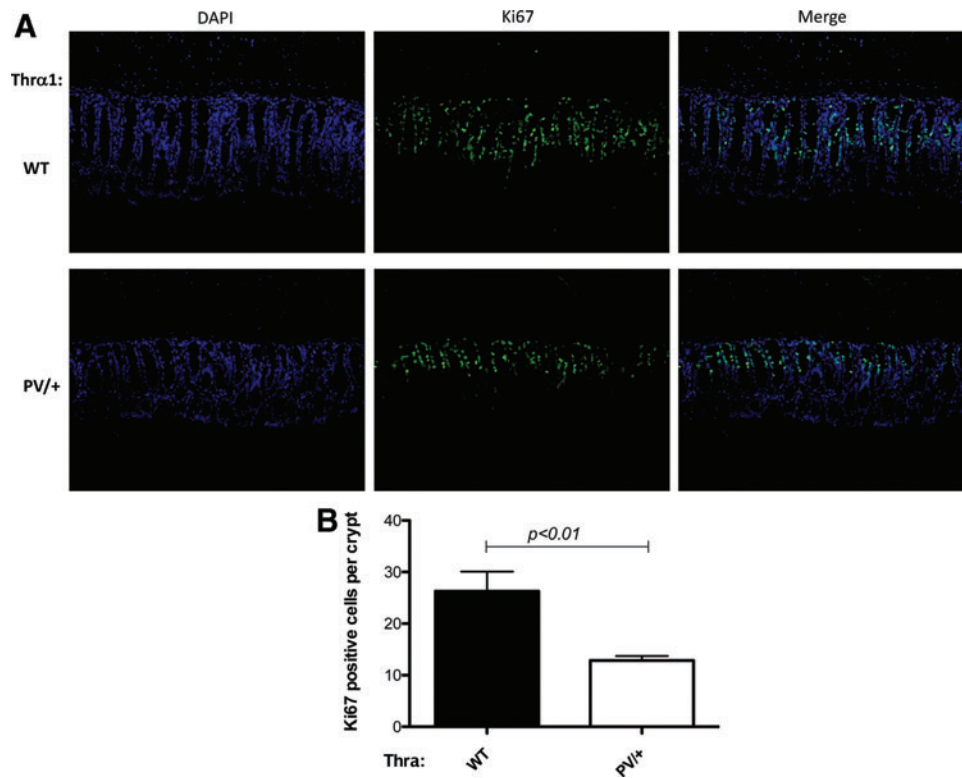

**SUPPLEMENTARY FIG. S2.** Reduced cell proliferation in the crypts of the large intestine in *Thral*<sup>PV/+</sup> mice. **(A)** Immunofluorescent staining for Ki67 was performed on large intestine sections of WT and *Thral*<sup>PV/+</sup> mice. **(B)** Quantified data of Ki67-positive cells in the crypt showing reduced cell proliferation in the *Thral*<sup>PV/+</sup> mice.
