# Supplementary material
Source: PubMed Central journal article supplement (PMC6437623)
Supplement: Supp_Fig3.pdf [file Supp_Fig3.pdf]

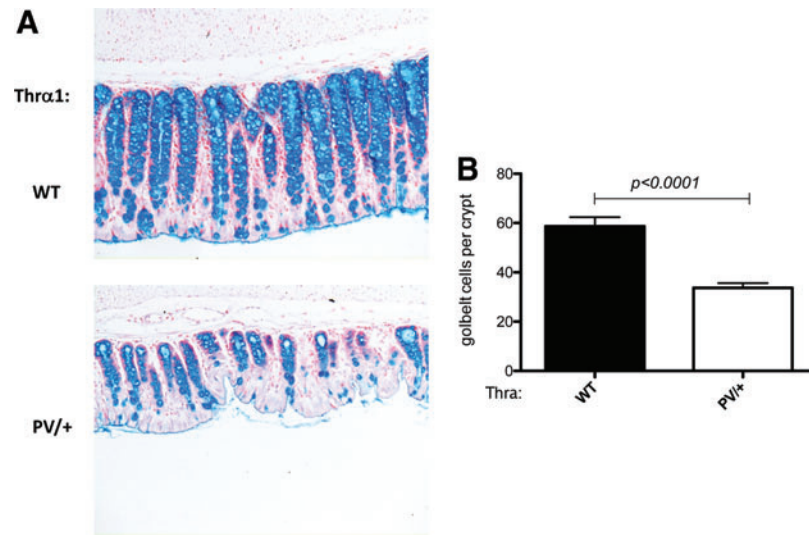

**SUPPLEMENTARY FIG. S3.** Reduced number of goblet cells in the crypts of the large intestine in *Thral*<sup>PV/+</sup> mice. (A) Alcian blue staining for goblet cells was performed on sections of WT and *Thral*<sup>PV/+</sup> mouse large intestine. (B) Quantification shows that the number of goblet cells was reduced in the crypt.
